# Supplementary figures and images for: Reinforcement of ultrahigh thermoresistant polybenzimidazole films by hard craters
Source: Royal Society of Chemistry journal article supplement (doi:10.1039/d2py00548d), 2022-01-01

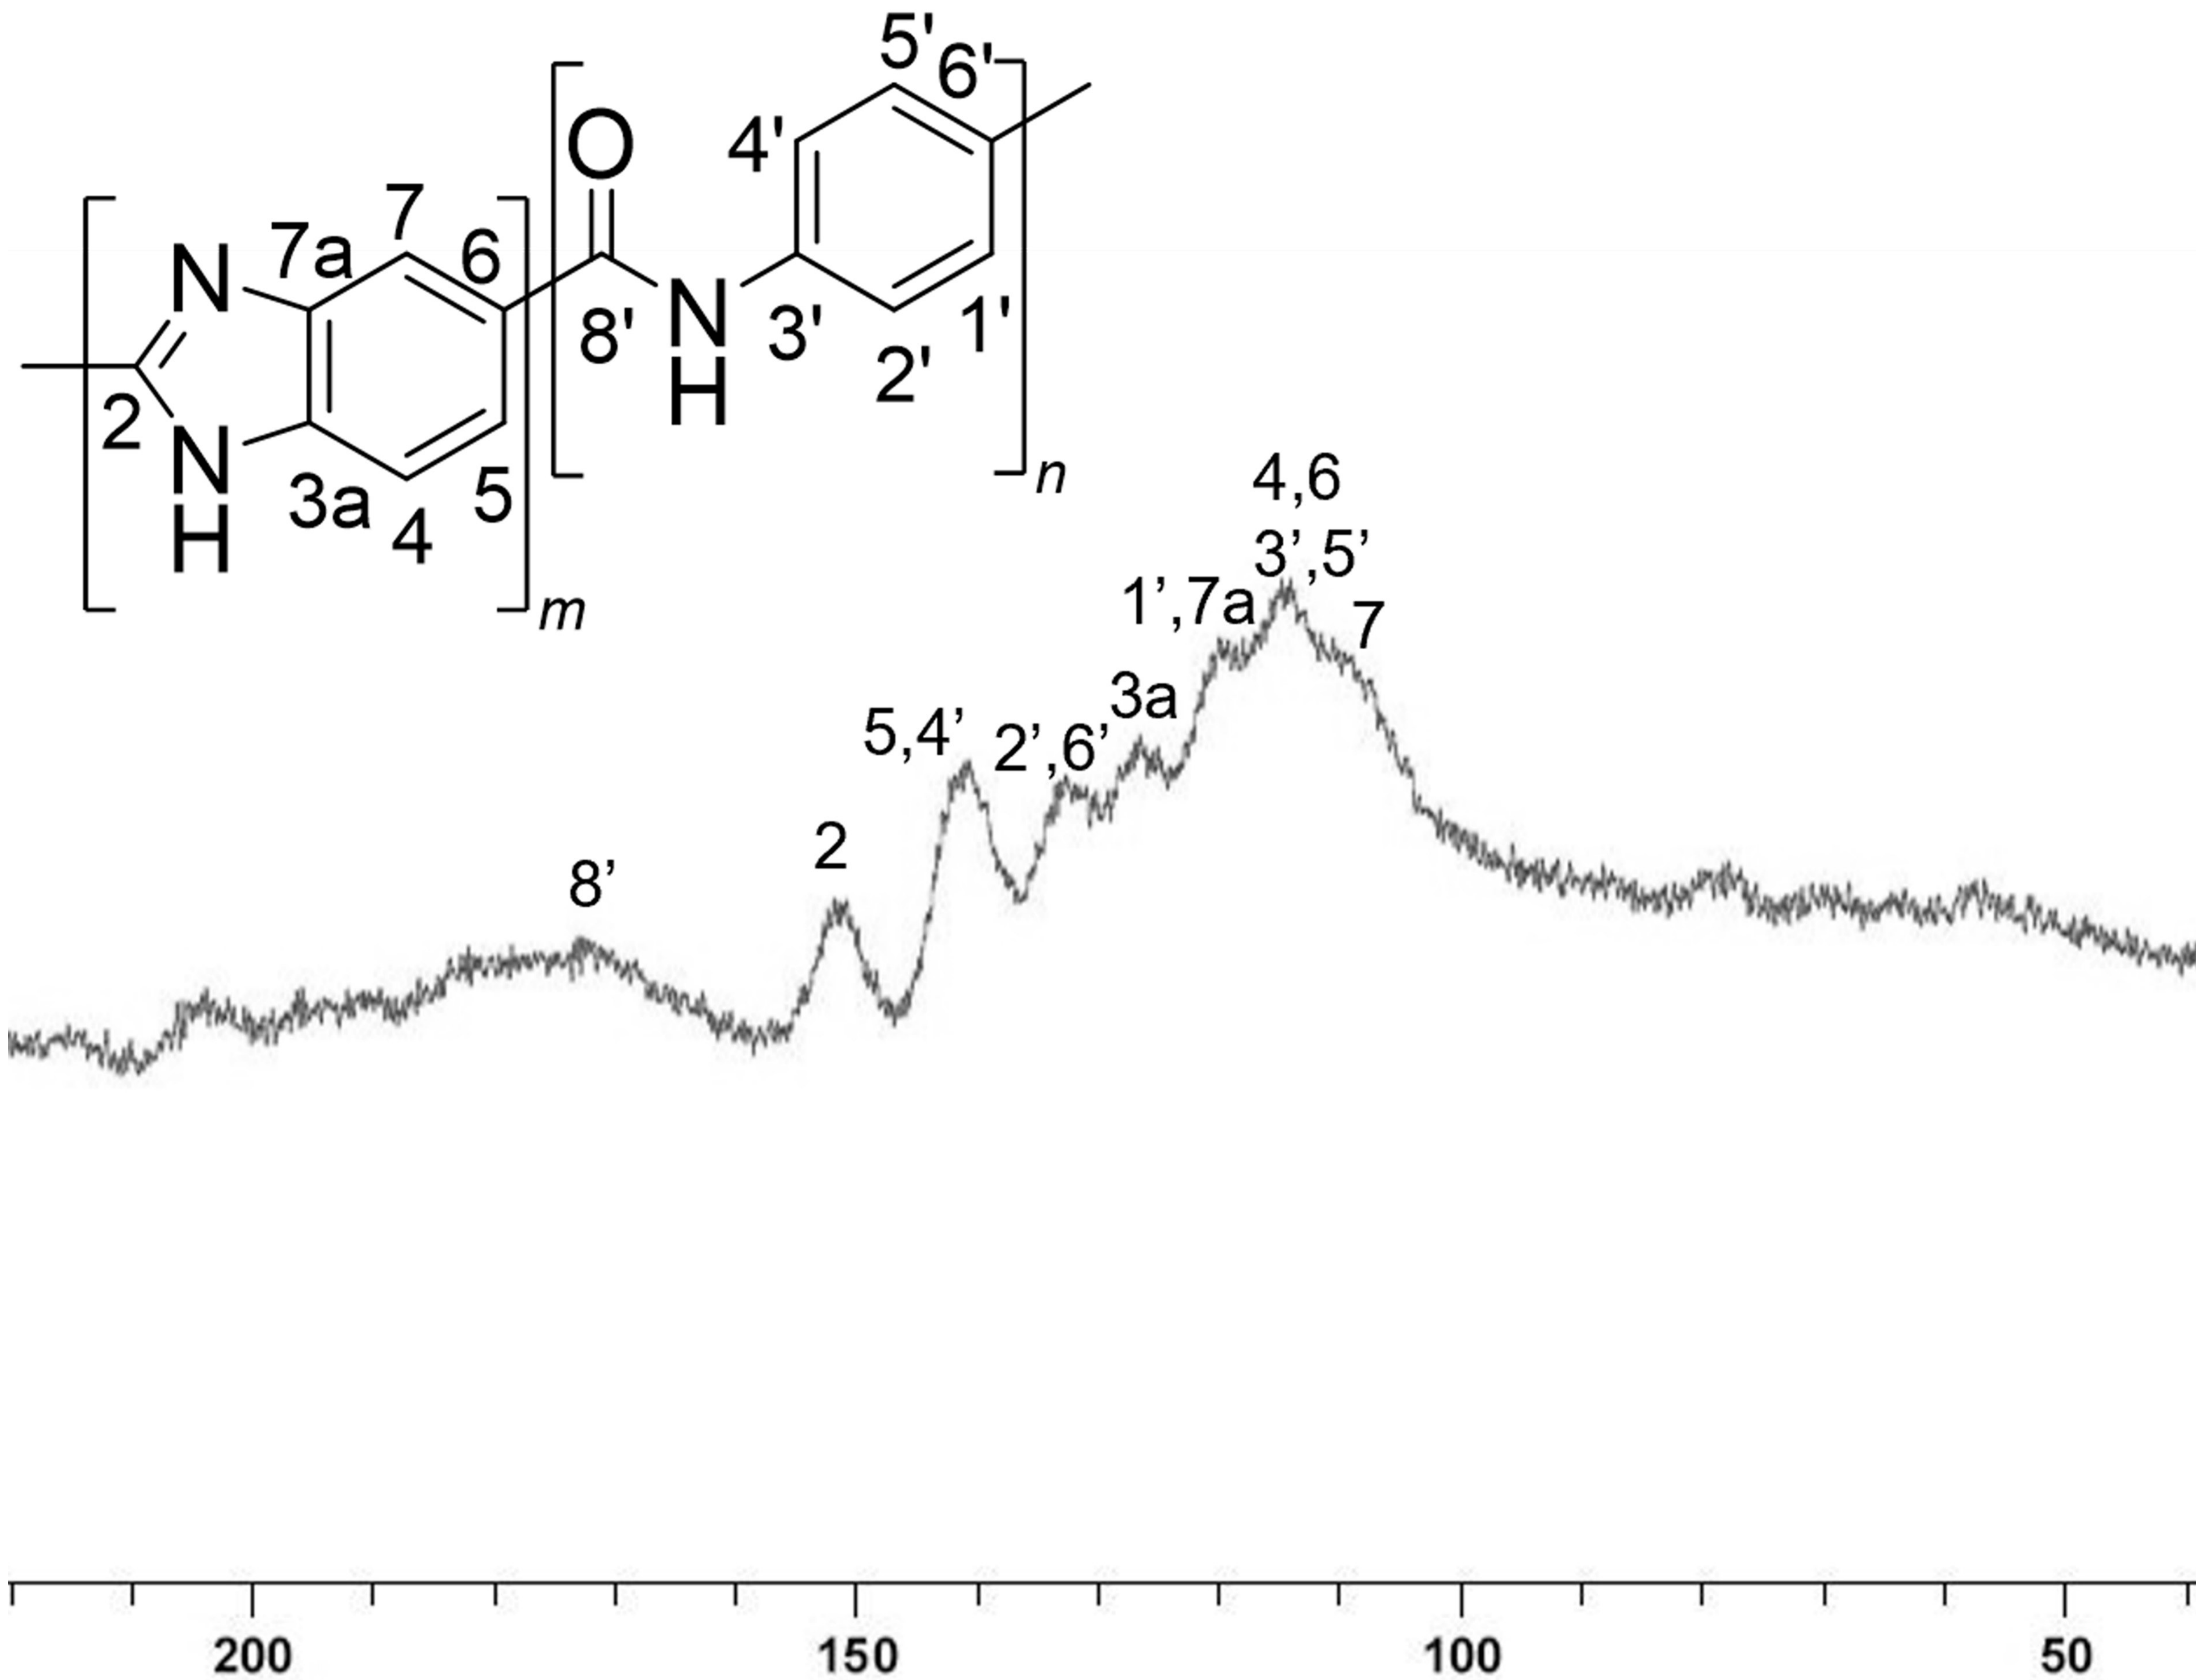

Supplement: d2py00548d2.pdf [file d2py00548d2.pdf]

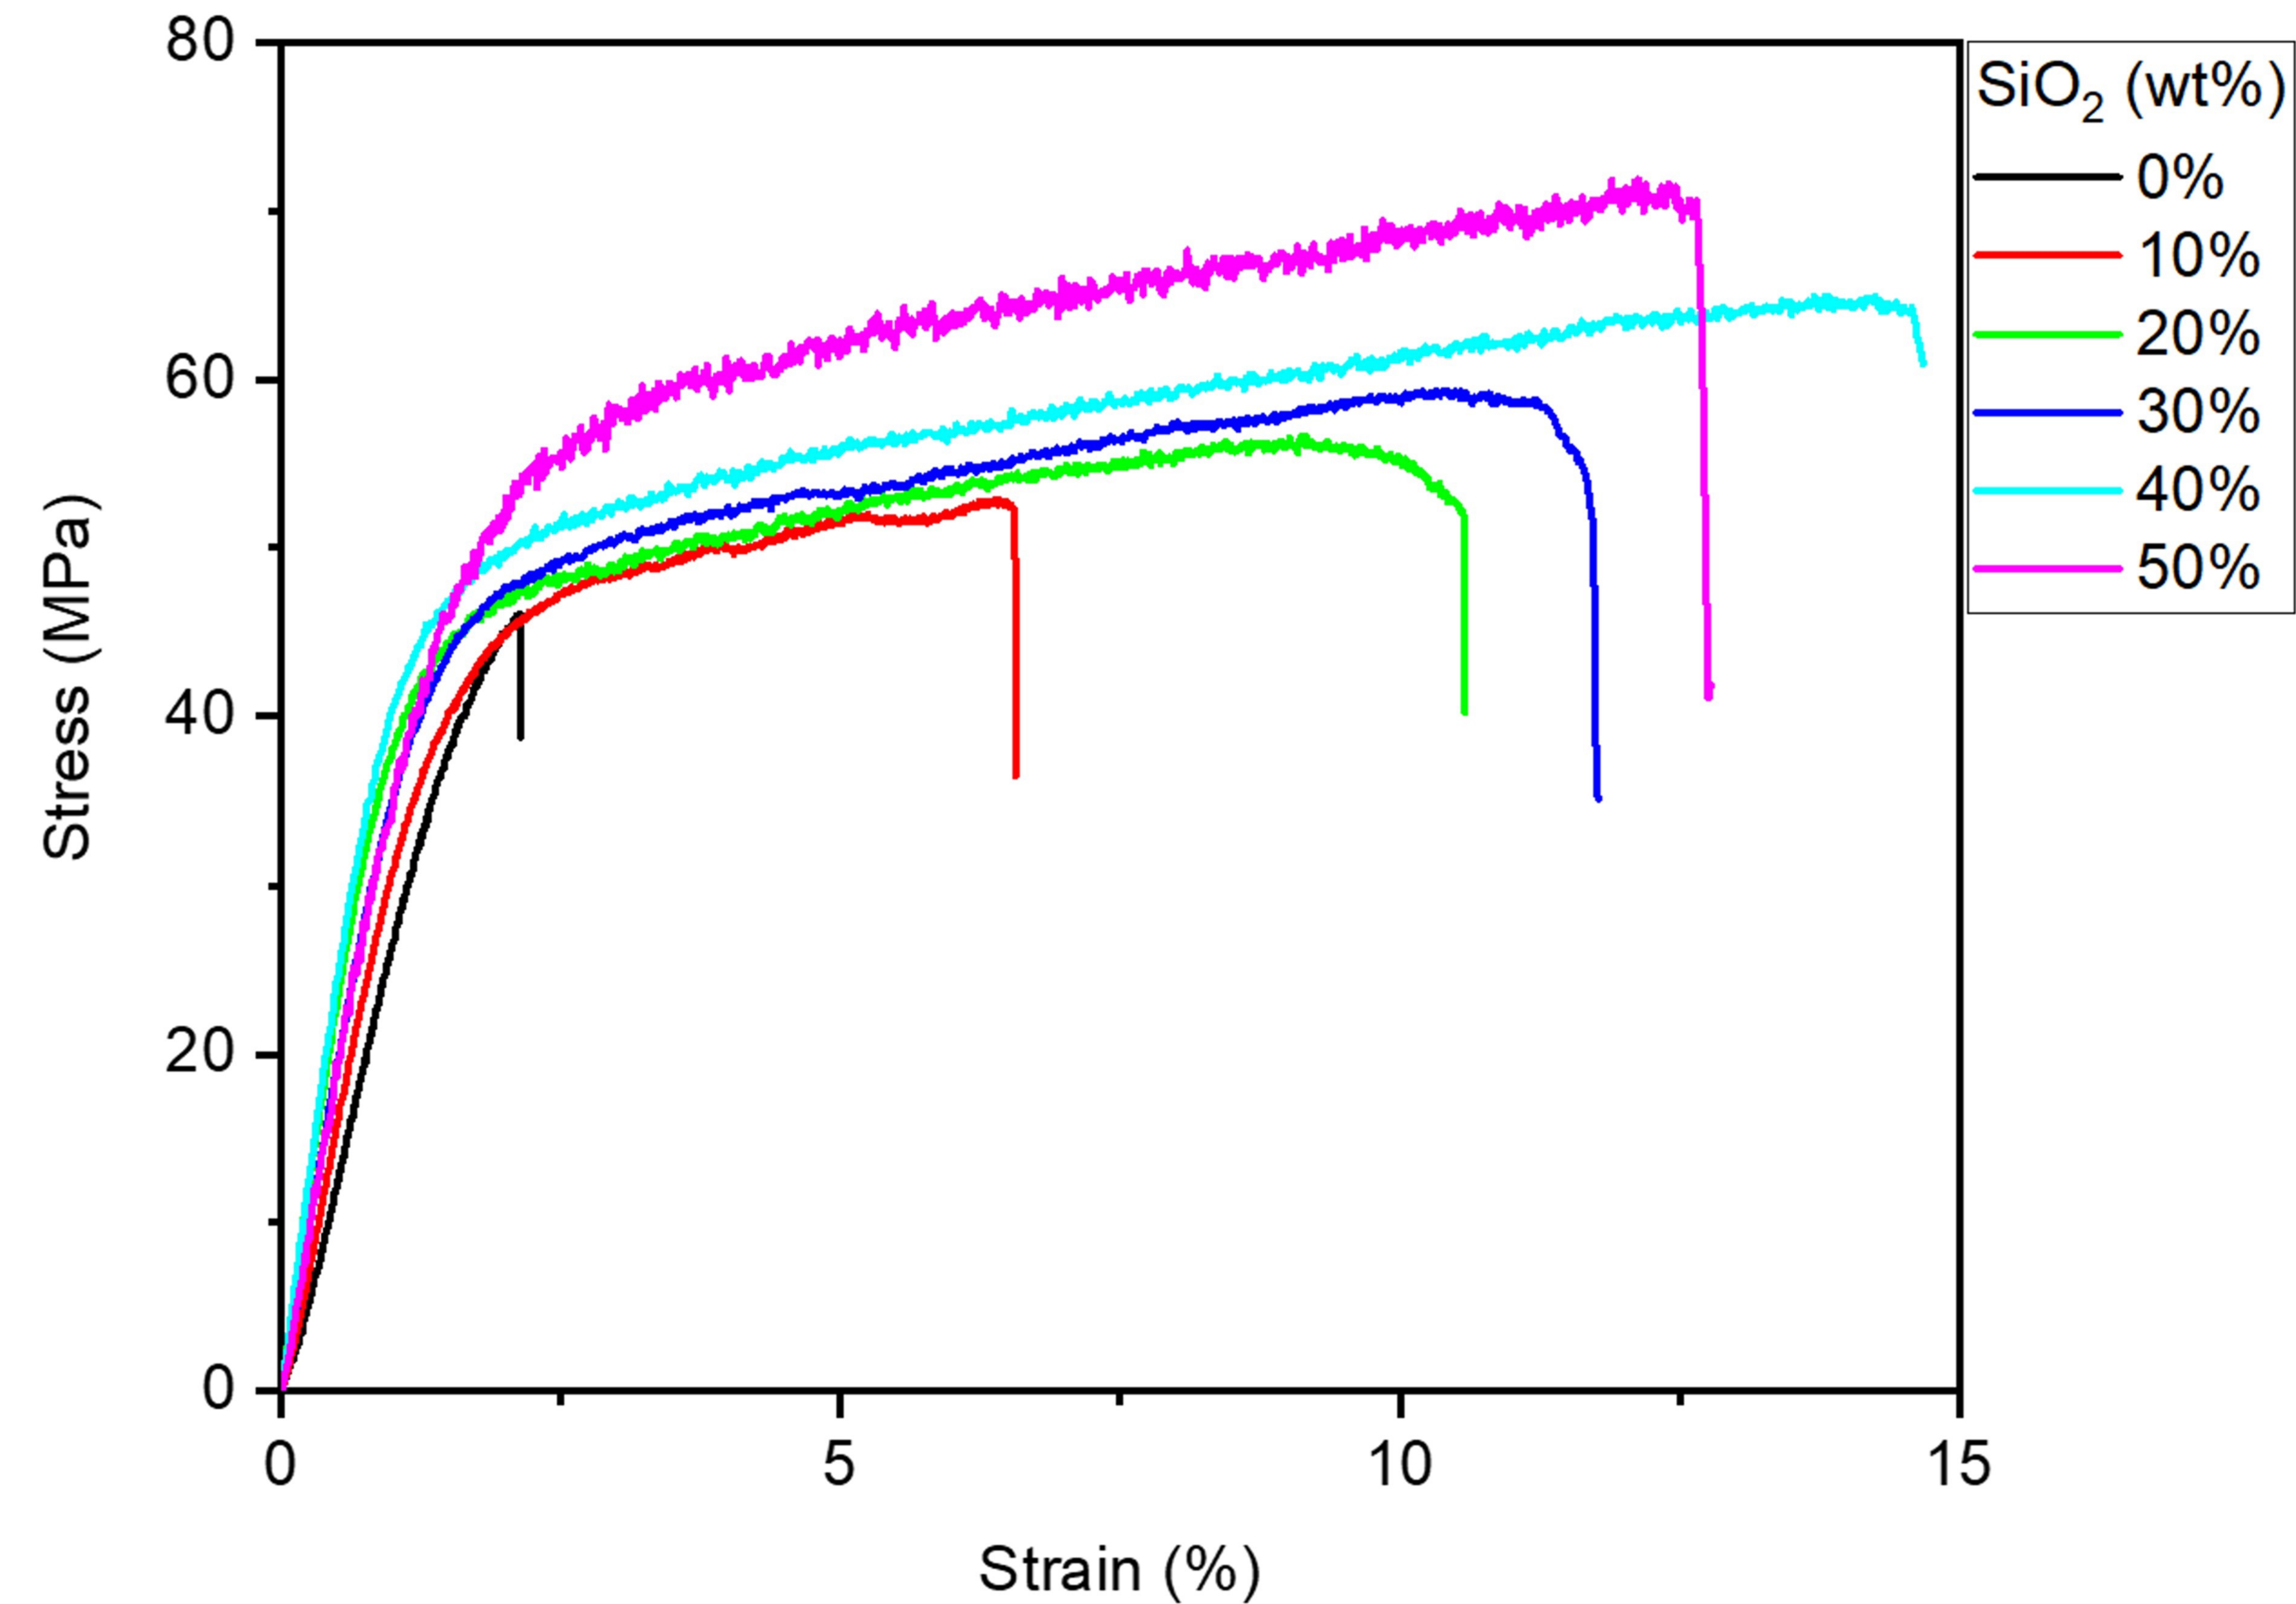

Supplement: d2py00548d4.pdf [file d2py00548d4.pdf]

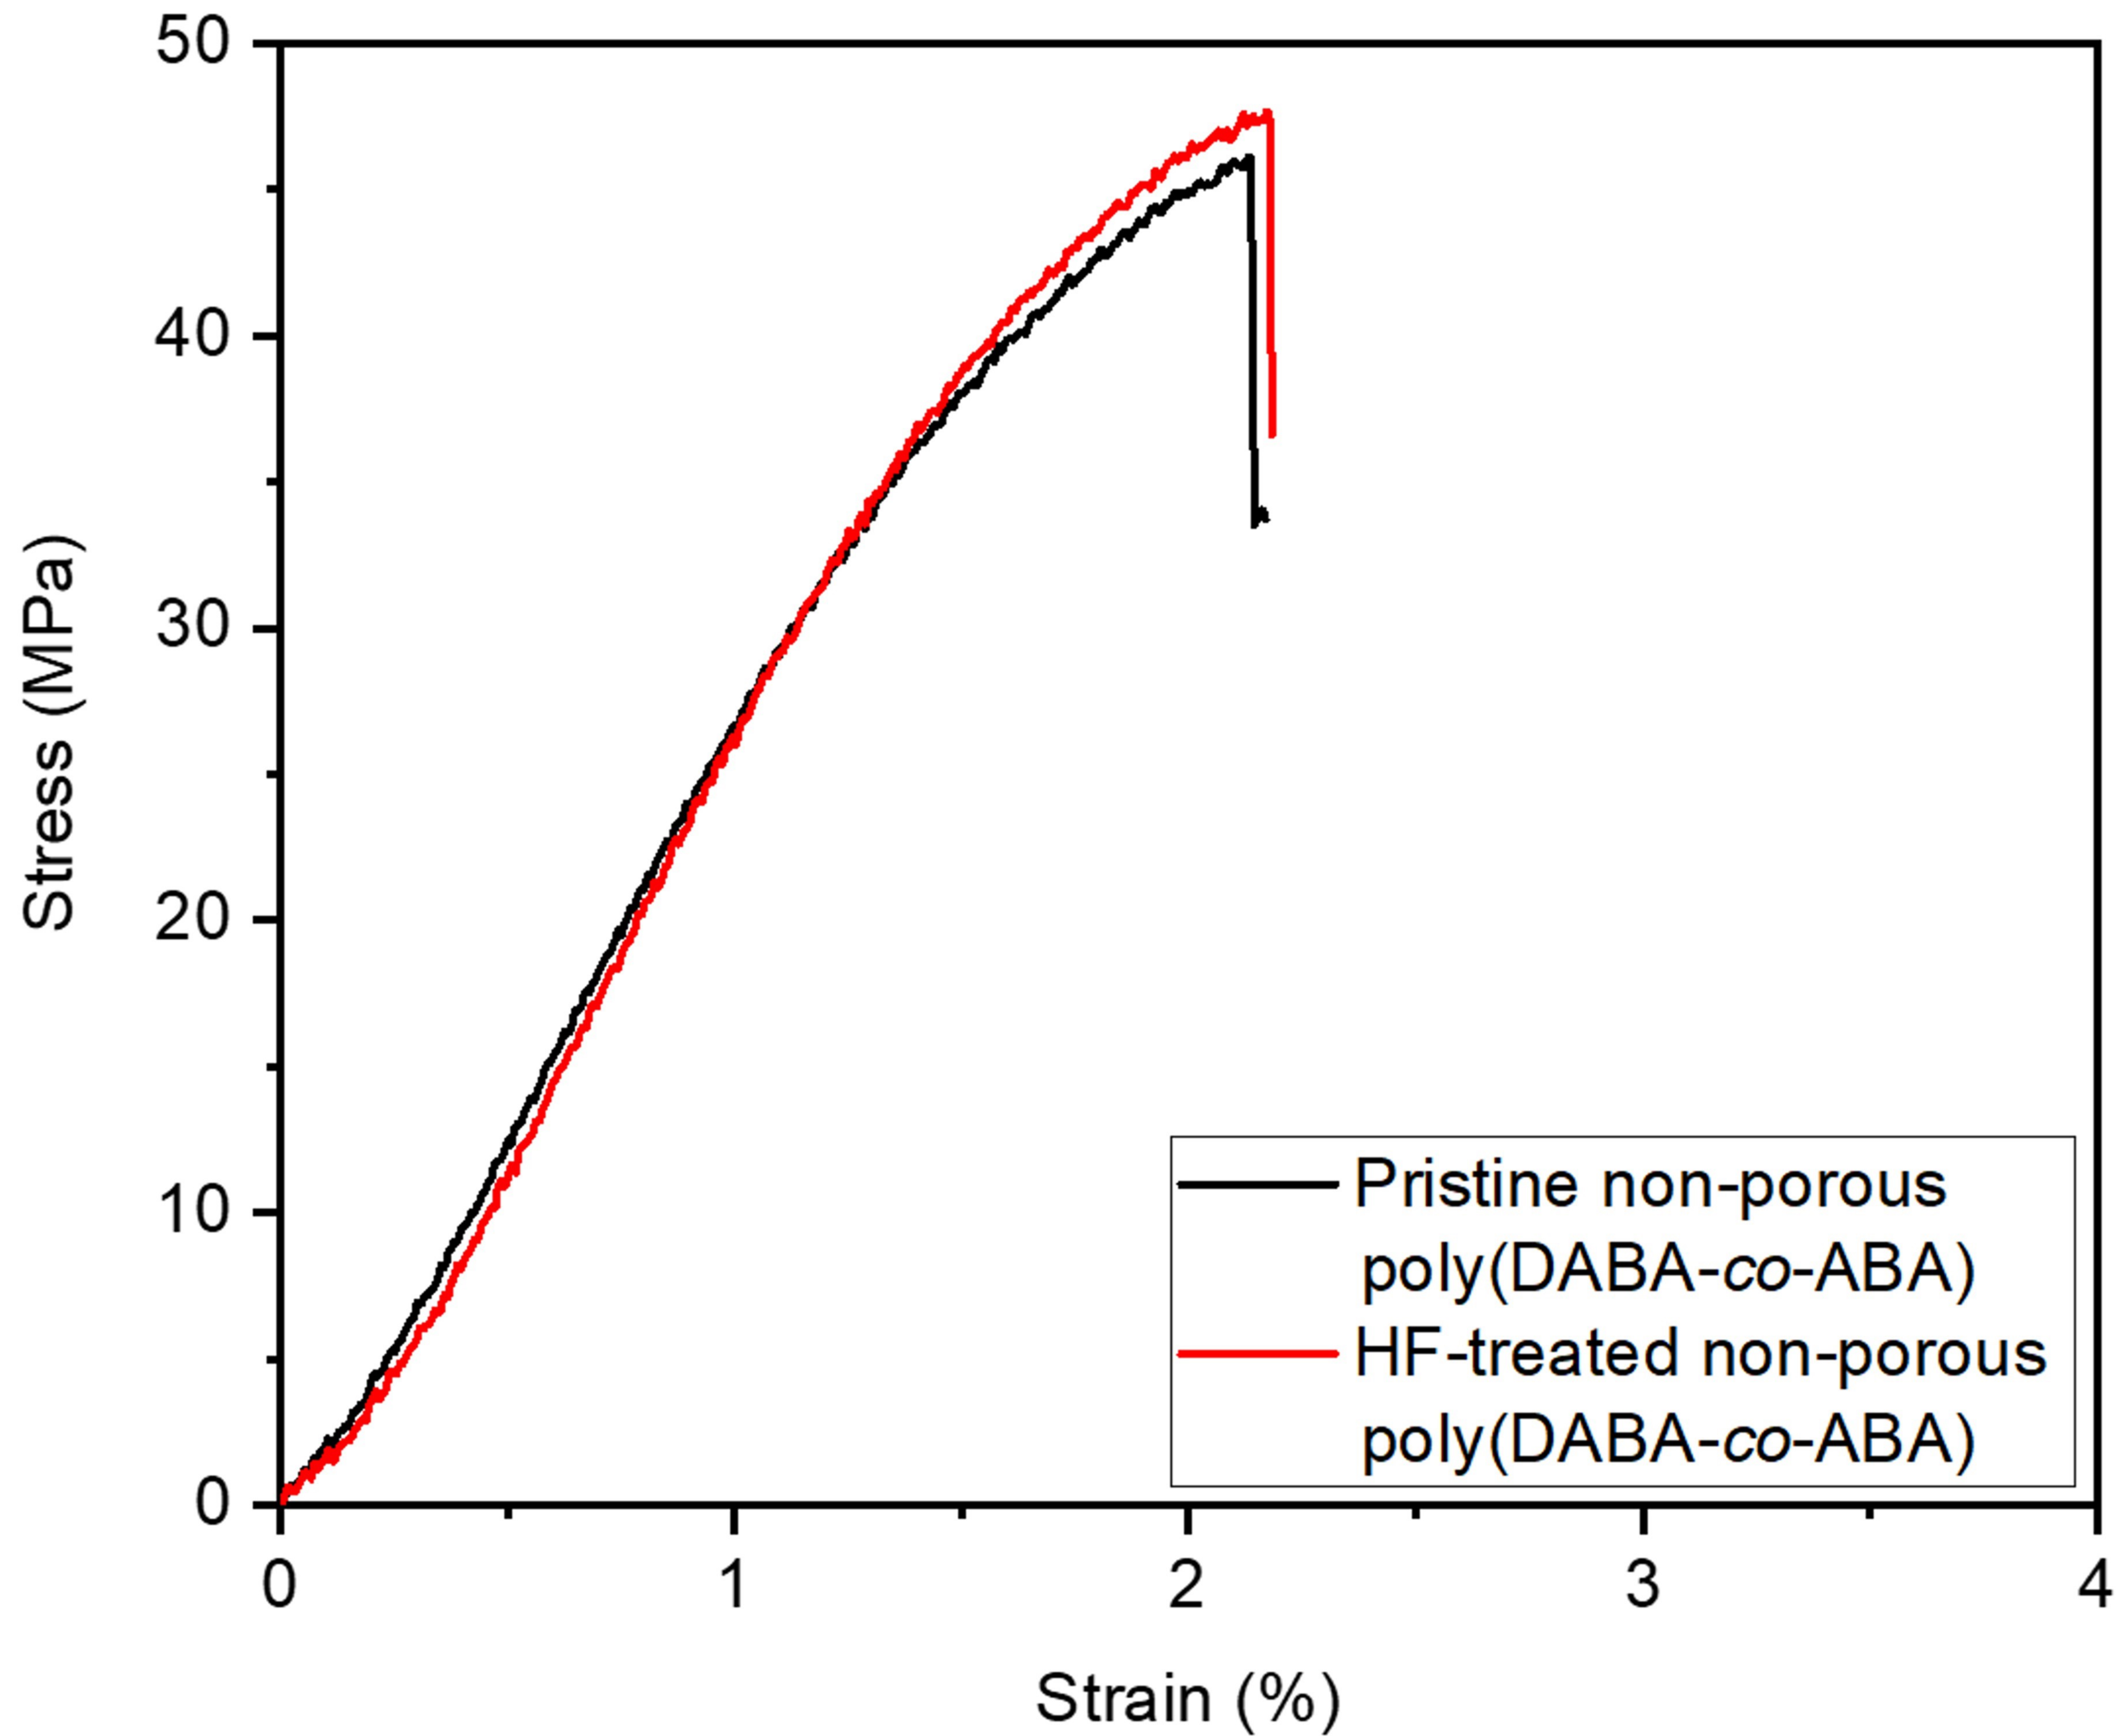

Supplement: d2py00548d5.pdf [file d2py00548d5.pdf]
